# Supplementary material
Source: PubMed Central journal article supplement (PMC6708782)

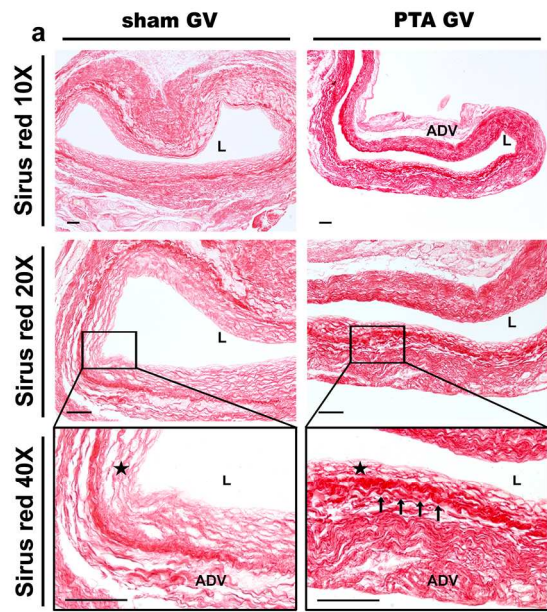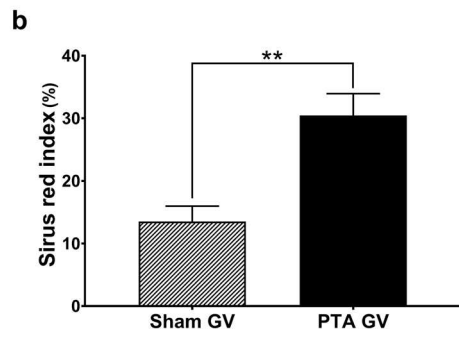

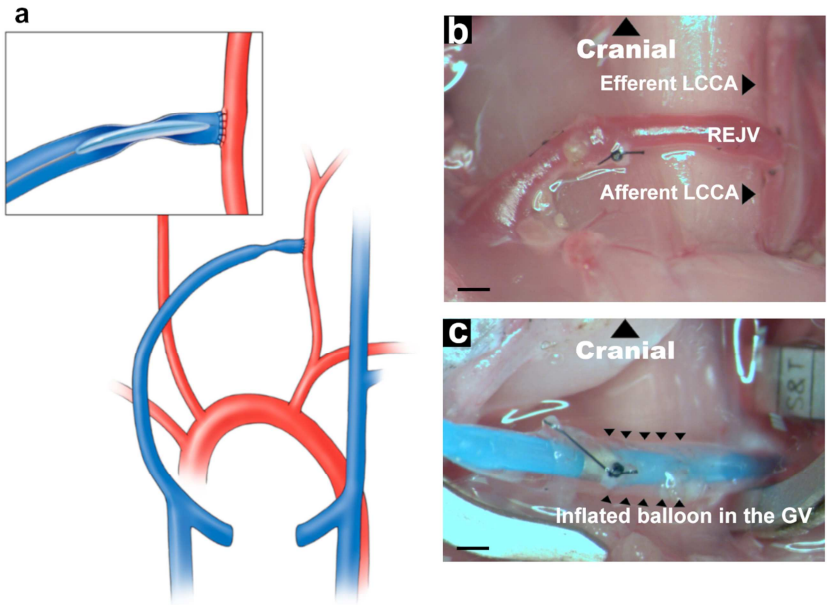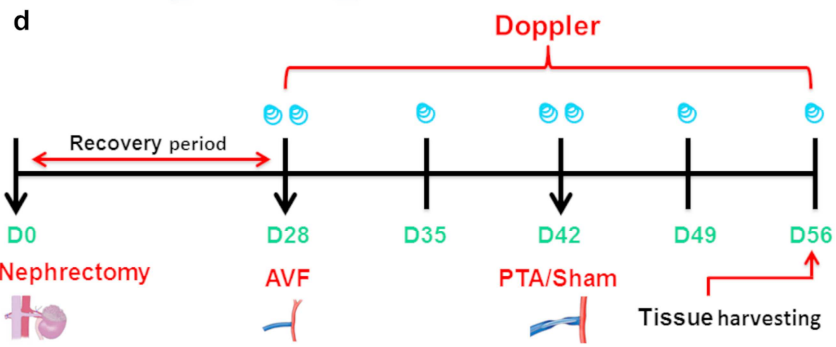

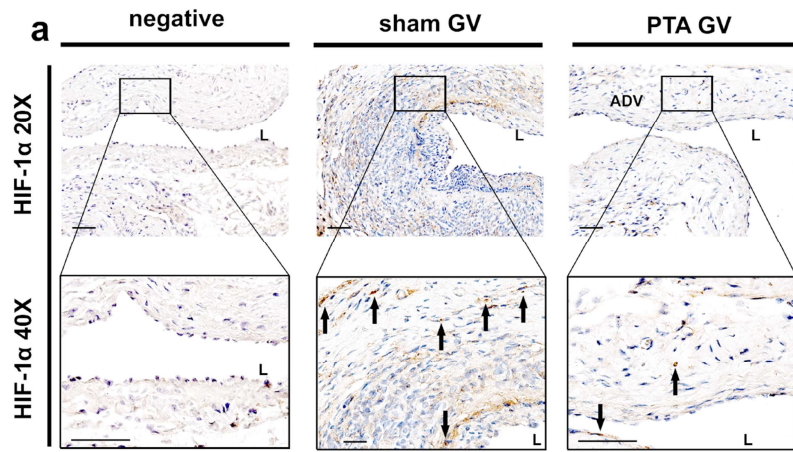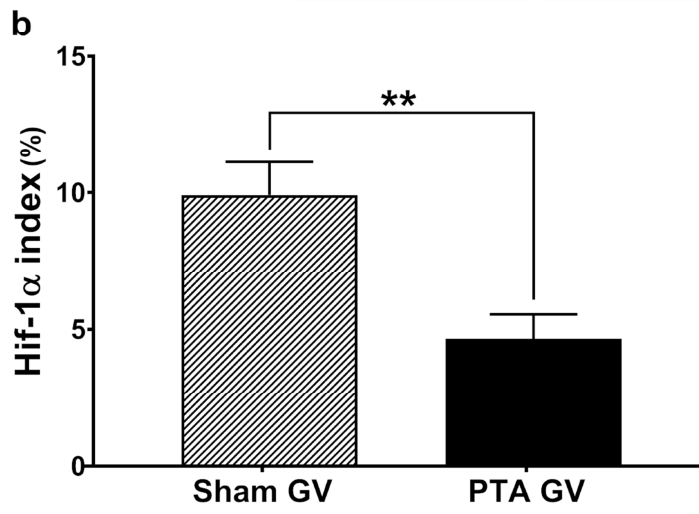

Supplement: NIHMS1516347-supplement-1.pdf [file NIHMS1516347-supplement-1.pdf]
